# Supplementary material
Source: Springer Nature journal article supplement (https://www.springermedizin.de/resource/supplementary/12876_2010_451_MOESM10_ESM.pdf/9437038)

# Blood

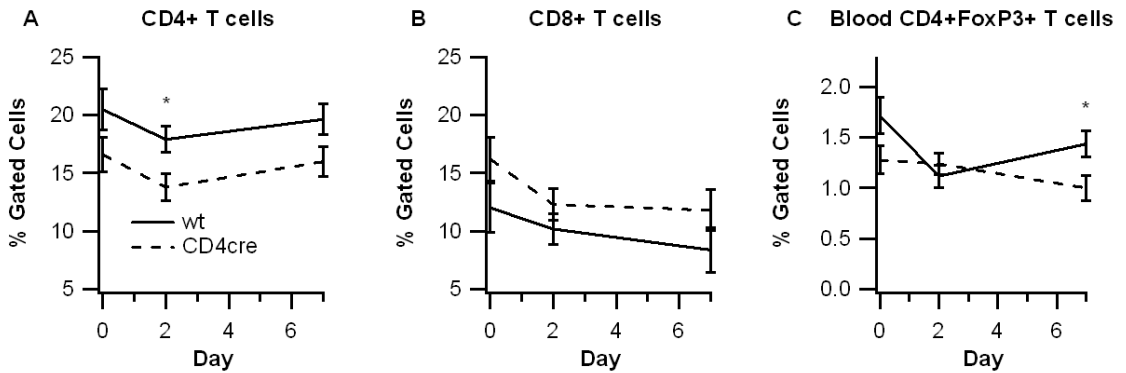

# Spleen

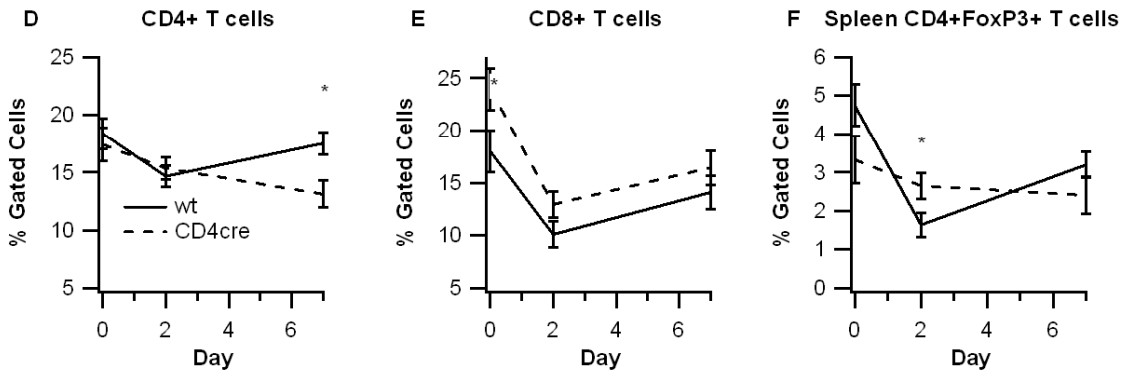

# MLN

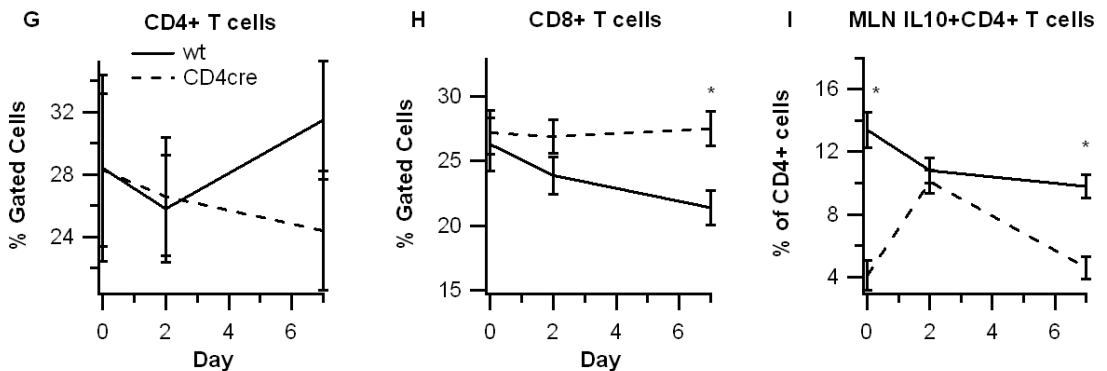

Supplement: MOESM10 [file 9437038]
